# Supplementary material
Source: PubMed Central journal article supplement (PMC3989643)
Supplement: embj0033-0371-sd6.pdf [file embj0033-0371-sd6.pdf]

**Supplementary Table S1.** Small RNA sequencing statistics: reads. R1, R2, R3 indicate biologically independent replicates.

| <b>Genotype</b>                                             | <b>Total reads</b> | <b>Genome-mapping reads</b> | <b>rRNA reads</b> | <b>Reads excluding rRNAs</b> | <b>miRNA reads</b> | <b>siRNA reads</b> | <b>cisNAT-mapping siRNA reads</b> | <b>Structured loci-mapping siRNA reads</b> | <b>Transposon-mapping siRNA reads</b> |
|-------------------------------------------------------------|--------------------|-----------------------------|-------------------|------------------------------|--------------------|--------------------|-----------------------------------|--------------------------------------------|---------------------------------------|
| <i>w<sup>1118</sup></i> (R1)                                | 27,971,451         | 23,645,223                  | 1,350,642         | 22,294,581                   | 8,790,430          | 375,562            | 4,894                             | 39,753                                     | 592,055                               |
| <i>w<sup>1118</sup></i> (R2)                                | 27,745,570         | 23,084,115                  | 648,449           | 22,435,666                   | 9,402,711          | 360,587            | 4,649                             | 38,889                                     | 583,048                               |
| <i>w<sup>1118</sup></i> (R3)                                | 30,637,561         | 25,112,967                  | 1,402,637         | 23,710,330                   | 9,614,787          | 460,696            | 5,294                             | 46,624                                     | 710,349                               |
| <i>w<sup>1118</sup>; dicer-2<sup>L811fsx</sup>/CyO</i> (R1) | 30,005,040         | 25,092,671                  | 766,897           | 24,325,774                   | 10,010,265         | 523,278            | 4,119                             | 23,383                                     | 791,012                               |
| <i>w<sup>1118</sup>; dicer-2<sup>L811fsx</sup>/CyO</i> (R2) | 31,265,161         | 25,745,474                  | 872,130           | 24,873,344                   | 11,089,351         | 542,957            | 4,262                             | 22,105                                     | 811,123                               |
| <i>w<sup>1118</sup>; dicer-2<sup>L811fsx</sup>/CyO</i> (R3) | 28,949,848         | 23,699,488                  | 1,043,923         | 22,655,565                   | 9,177,101          | 469,312            | 3,419                             | 18,713                                     | 720,290                               |
| <i>w<sup>1118</sup>; dicer-2<sup>L811fsx</sup></i> (R1)     | 26,797,201         | 22,187,718                  | 998,314           | 21,189,404                   | 7,907,956          | 279,306            | 653                               | 2,854                                      | 525,773                               |
| <i>w<sup>1118</sup>; dicer-2<sup>L811fsx</sup></i> (R2)     | 29,965,183         | 24,601,061                  | 1,186,220         | 23,414,841                   | 9,666,166          | 254,680            | 770                               | 2,123                                      | 549,160                               |
| <i>w<sup>1118</sup>; dicer-2<sup>L811fsx</sup></i> (R3)     | 27,808,652         | 21,233,397                  | 1,147,334         | 20,086,063                   | 8,024,274          | 245,927            | 667                               | 3,640                                      | 486,807                               |
| <i>w<sup>1118</sup>; dicer-2<sup>G31R</sup>/CyO</i> (R1)    | 30,581,605         | 26,033,620                  | 2,052,302         | 23,981,318                   | 9,321,003          | 288,021            | 3,908                             | 31,854                                     | 547,069                               |
| <i>w<sup>1118</sup>; dicer-2<sup>G31R</sup>/CyO</i> (R2)    | 30,363,738         | 25,468,822                  | 2,314,633         | 23,154,189                   | 9,516,400          | 373,111            | 4,153                             | 30,249                                     | 598,487                               |

|                                                                     |            |            |           |            |           |         |       |        |         |
|---------------------------------------------------------------------|------------|------------|-----------|------------|-----------|---------|-------|--------|---------|
| <i>w</i> <sup>1118</sup> ; <i>dicer-2</i> <sup>G31R</sup> /CyO (R3) | 32,044,414 | 26,380,139 | 1,034,677 | 25,345,462 | 9,787,488 | 453,207 | 4,586 | 35,367 | 714,553 |
| <i>w</i> <sup>1118</sup> ; <i>dicer-2</i> <sup>G31R</sup> (R1)      | 29,517,967 | 24,723,915 | 835,433   | 23,888,482 | 9,649,112 | 253,237 | 1,346 | 1,064  | 483,694 |
| <i>w</i> <sup>1118</sup> ; <i>dicer-2</i> <sup>G31R</sup> (R2)      | 31,448,489 | 24,630,926 | 1,164,686 | 23,466,240 | 9,664,843 | 214,567 | 1,204 | 1,005  | 463,176 |
| <i>w</i> <sup>1118</sup> ; <i>dicer-2</i> <sup>G31R</sup> (R3)      | 28,939,762 | 23,752,069 | 1,339,803 | 22,412,266 | 8,755,057 | 221,349 | 1,207 | 1,075  | 456,036 |
