# Supplementary material
Source: PubMed Central journal article supplement (PMC3989643)
Supplement: embj0033-0371-sd7.pdf [file embj0033-0371-sd7.pdf]

**Supplementary Table S2.** Small RNA sequencing statistics: species.

| <b>Genotype</b>                                                        | <b>Total species</b> | <b>Genome-mapping species</b> | <b>Species excluding rRNAs</b> | <b>miRNA species</b> | <b>siRNA species</b> | <b>cisNAT-mapping siRNA species</b> | <b>Structured loci-mapping siRNA species</b> | <b>Transposon-mapping siRNA species</b> |
|------------------------------------------------------------------------|----------------------|-------------------------------|--------------------------------|----------------------|----------------------|-------------------------------------|----------------------------------------------|-----------------------------------------|
| <i>w</i> <sup>1118</sup> (R1)                                          | 4,407,270            | 2,881,354                     | 2,850,789                      | 2,940                | 132,859              | 2,784                               | 835                                          | 129,240                                 |
| <i>w</i> <sup>1118</sup> (R2)                                          | 4,089,341            | 2,527,884                     | 2,501,626                      | 2,667                | 111,000              | 2,308                               | 721                                          | 107,971                                 |
| <i>w</i> <sup>1118</sup> (R3)                                          | 4,778,380            | 2,774,104                     | 2,743,086                      | 2,795                | 140,442              | 2,580                               | 863                                          | 136,999                                 |
| <i>w</i> <sup>1118</sup> ; <i>dicer-2</i> <sup>L811fsx</sup> /CyO (R1) | 4,087,835            | 2,620,307                     | 2,587,370                      | 2,769                | 145,215              | 1,919                               | 721                                          | 142,575                                 |
| <i>w</i> <sup>1118</sup> ; <i>dicer-2</i> <sup>L811fsx</sup> /CyO (R2) | 4,251,225            | 2,575,333                     | 2,542,743                      | 2,896                | 147,396              | 1,968                               | 725                                          | 144,703                                 |
| <i>w</i> <sup>1118</sup> ; <i>dicer-2</i> <sup>L811fsx</sup> /CyO (R3) | 4,449,139            | 2,563,125                     | 2,526,974                      | 2,725                | 133,757              | 1,681                               | 659                                          | 131,417                                 |
| <i>w</i> <sup>1118</sup> ; <i>dicer-2</i> <sup>L811fsx</sup> (R1)      | 3,880,401            | 2,425,149                     | 2,389,220                      | 2,698                | 94,839               | 247                                 | 282                                          | 94,310                                  |
| <i>w</i> <sup>1118</sup> ; <i>dicer-2</i> <sup>L811fsx</sup> (R2)      | 3,645,626            | 2,109,692                     | 2,077,833                      | 2,480                | 68,770               | 189                                 | 215                                          | 68,366                                  |
| <i>w</i> <sup>1118</sup> ; <i>dicer-2</i> <sup>L811fsx</sup> (R3)      | 4,167,216            | 2,155,205                     | 2,122,701                      | 2,607                | 75,546               | 203                                 | 263                                          | 75,080                                  |
| <i>w</i> <sup>1118</sup> ; <i>dicer-2</i> <sup>G31R</sup> /CyO (R1)    | 4,184,046            | 2,962,878                     | 2,504,442                      | 2,721                | 97,325               | 1,895                               | 664                                          | 94,766                                  |
| <i>w</i> <sup>1118</sup> ; <i>dicer-2</i> <sup>G31R</sup> /CyO (R2)    | 5,007,028            | 2,540,667                     | 2,902,248                      | 2,802                | 116,786              | 2,178                               | 743                                          | 113,865                                 |

|                                                                     |           |           |           |       |         |       |     |         |
|---------------------------------------------------------------------|-----------|-----------|-----------|-------|---------|-------|-----|---------|
| <i>w</i> <sup>1118</sup> ; <i>dicer-2</i> <sup>G31R</sup> /CyO (R3) | 4,407,270 | 2,933,478 | 2,850,789 | 2,940 | 132,859 | 2,784 | 835 | 129,240 |
| <i>w</i> <sup>1118</sup> ; <i>dicer-2</i> <sup>G31R</sup> (R1)      | 4,162,316 | 2,353,870 | 2,367,493 | 2,659 | 68,357  | 542   | 154 | 67,661  |
| <i>w</i> <sup>1118</sup> ; <i>dicer-2</i> <sup>G31R</sup> (R2)      | 4,254,552 | 2,399,447 | 2,341,880 | 2,566 | 70,252  | 528   | 166 | 69,558  |
| <i>w</i> <sup>1118</sup> ; <i>dicer-2</i> <sup>G31R</sup> (R3)      | 4,579,558 | 2,371,450 | 2,928,774 | 2,548 | 84,149  | 1,843 | 571 | 81,735  |
