# Supplementary material
Source: PubMed Central journal article supplement (PMC3989643)
Supplement: embj0033-0371-sd8.pdf [file embj0033-0371-sd8.pdf]

**Supplementary Table S3.** Normalized small RNA abundance (ppm). Data are mean of three biologically independent replicates  $\pm$  SD.

| <b>Genotype</b>                                        | <b>esi-1.1</b> | <b>esi-1.2</b>  | <b>esi-2.1</b>      |
|--------------------------------------------------------|----------------|-----------------|---------------------|
| <i>w<sup>1118</sup></i>                                | 20.4 $\pm$ 1.9 | 49.8 $\pm$ 14.4 | 26,698 $\pm$ 1,312  |
| <i>w<sup>1118</sup>; dicer-2<sup>L811fsx</sup>/CyO</i> | 10.4 $\pm$ 1.0 | 10.0 $\pm$ 2.3  | 12,170 $\pm$ 1,360  |
| <i>w<sup>1118</sup>; dicer-2<sup>L811fsx</sup></i>     | 0.1 $\pm$ 0.1  | 0.2 $\pm$ 0.2   | 174.8 $\pm$ 27.2    |
| <i>w<sup>1118</sup>; dicer-2<sup>G31R</sup>/CyO</i>    | 12.5 $\pm$ 0.4 | 33.7 $\pm$ 1.5  | 29,024 $\pm$ 10,024 |
| <i>w<sup>1118</sup>; dicer-2<sup>G31R</sup></i>        | 0.1 $\pm$ 0.1  | 0.2 $\pm$ 0.0   | 201.3 $\pm$ 17.3    |
