# Supplementary material
Source: PubMed Central journal article supplement (PMC3989643)
Supplement: embj0033-0371-sd9.pdf [file embj0033-0371-sd9.pdf]

**Supplementary Table S4. Sequences of RNA oligonucleotides.**

*Deoxynucleotide.*

|                                                             |                                                                                                |
|-------------------------------------------------------------|------------------------------------------------------------------------------------------------|
| pre- <i>let-7</i><br>wild type                              | 5'-UGA GGU AGU AGG UUG UAU AGU AGU AAU<br>UAC ACA UCA UAC UAU ACA AUG UGC UAG CUU<br>UCU-3'    |
| pre- <i>let-7</i><br>blunt end                              | 5'-AGU GAG GUA GUA GGU UGU AUA GUA GUA<br>AUU ACA CAU CAU ACU AUA CAA UGU GCU AGC<br>UUU CU-3' |
| pre- <i>let-7</i><br>perfect match stem                     | 5'-UGA GGU AGU AGG UUG UAU AGU AGU AAU<br>UAC ACA UCA UAC UAU ACA ACC UAC UAC CUC<br>UCU-3'    |
| pre- <i>let-7</i><br>tetraloop                              | 5'-UGA GGU AGU AGG UUG UAU AGU AGA AAU<br>ACU AUA CAA UGU GCU AGC UUU CU-3'                    |
| pre- <i>let-7</i> perfect match<br>stem and tetraloop       | 5'-UGA GGU AGU AGG UUG UAU AGU AGA AAU<br>ACU AUA CAA CCU ACU ACC UCU CU-3'                    |
| Strand 1 of 5'-PO <sub>4</sub> , 3'<br>overhang 25 bp dsRNA | 5'-ACC CUG AAG UUC AUC UGC ACC ACC <u>AG</u> -3'                                               |
| Strand 1 of 5'-PO <sub>4</sub> ,<br>blunt 27 bp dsRNA       | 5'-UGA CCC UGA AGU UCA UCU GCA CCA <u>CCG</u> -3'                                              |
| Strand 2 of 25 bp<br>or 27 bp dsRNA                         | 5'-CGG UGG UGC AGA UGA ACU UCA GGG UCA-3'                                                      |
| Strand 1 of<br>30 bp dsRNA                                  | 5'-GGA GGU AGU AGG UUG UAU AGU AGU AAG<br><u>ACC</u> -3'                                       |
| Strand 2 of blunt<br>30 bp dsRNA                            | 5'-GGU CUU ACU ACU AUA CAA CCU ACU ACC<br><u>UCC</u> -3'                                       |
| Strand 2 of 3' overhang<br>30 bp dsRNA                      | 5'-GGU CUU ACU ACU AUA CAA CCU ACU ACC UCC<br><u>AC</u> -3'                                    |
| Strand 1 of<br>38 bp dsRNA                                  | 5'-GGA GGU AGU AGG UUG UAU AGU AGU AAG ACC<br>AGA CCC <u>UA</u> -3'                            |
| Strand 2 of blunt<br>38 bp dsRNA                            | 5'-UAG GGU CUG GUC UUA CUA CUA UAC AAC CUA<br>CUA CCU CC-3'                                    |

|                                        |                                                                                                                       |
|----------------------------------------|-----------------------------------------------------------------------------------------------------------------------|
| Strand 2 of 3' overhang<br>38 bp dsRNA | 5'-UAG GGU CUG GUC UUA CUA CUA UAC AAC CUA<br>CUA CCU CCA C-3'                                                        |
| Strand 1 of<br>52 bp dsRNA             | 5'-GGA GGU AGU AGG UUG UAU AGU AGU AAG ACC<br>AGA CCC UAG ACC AAU UCA UGC <u>C</u> -3'                                |
| Strand 2 of blunt<br>52 bp dsRNA       | 5'-GGC AUG AAU UGG UCU AGG GUC UGG UCU<br>UAC UAC UAU ACA ACC UAC UAC CUC C-3'                                        |
| Strand 2 of 3' overhang<br>52 bp dsRNA | 5'-GGC AUG AAU UGG UCU AGG GUC UGG UCU<br>UAC UAC UAU ACA ACC UAC UAC CUC CAC-3                                       |
| Strand 1 of<br>73 bp dsRNA             | 5'-GGA GGU AGU AGG UUG UAU AGU AGU AAG ACC<br>AGA CCC UAG ACC AAU UCA UGC CAC CGA AGC<br>AAA UUU CAA UGC <u>C</u> -3' |
| Strand 2 of blunt<br>73 bp dsRNA       | 5'-GGC AUU GAA AUU UGC UUC GGU CGC AUG AAU<br>UGG UCU AGG GUC UGG UCU UAC UAC UAU ACA<br>ACC UAC UAC CUC C-3'         |
| Strand 2 of 3' overhang<br>73 bp dsRNA | 5'-GGC AUU GAA AUU UGC UUC GGU CGC AUG AAU<br>UGG UCU AGG GUC UGG UCU UAC UAC UAU ACA<br>ACC UAC UAC CUC CAC-3'       |
