# Supplementary material
Source: PubMed Central journal article supplement (PMC3989643)
Supplement: embj0033-0371-sd10.pdf [file embj0033-0371-sd10.pdf]

## **Supplemental information for**

### **Inorganic phosphate blocks binding of pre-miRNA to Dicer-2 via its PAZ domain**

Ryuya Fukunaga<sup>1,2\*</sup>, Cansu Colpan<sup>1</sup>, Bo W. Han<sup>1</sup>, and Phillip D. Zamore<sup>1,\*</sup>

<sup>1</sup>Howard Hughes Medical Institute, RNA Therapeutics Institute, and Department of Biochemistry and Molecular Pharmacology, University of Massachusetts Medical School, 368 Plantation Street, Worcester, MA 01605, USA

<sup>2</sup>Department of Biological Chemistry, Johns Hopkins University School of Medicine, 725 North Wolfe Street, 521A Physiology Building, Baltimore, MD 21205, USA

\*Correspondence: fukunaga@jhmi.edu, phillip.zamore@umassmed.edu

#### **Four Supplemental Figures**

**Supplemental Figure S1. Purified Dicer-2 produces shorter RNA products from pre-miRNA than does purified Dicer-1**

**Supplemental Figure S2. Inorganic phosphate inhibits binding to Dicer-2 of pre-miRNA and short dsRNA, but not long dsRNA**

**Supplemental Figure S3. Dicer-2 requires a 5' monophosphate to efficiently cleave pre-miRNA**

**Supplemental Figure S4. Dicer-2 requires a 5' monophosphorylated, two-nucleotide 3' overhanging end and is inhibited by inorganic phosphate for processing of short, but not long, dsRNA**

**Supplemental Figure S5. Inorganic phosphate increased  $K_M$  and decreases  $k_{cat}$  of Dicer-2 for pre-*let-7* and 30 bp dsRNA, but not 104 bp dsRNA**

#### **Four Supplemental Tables**

**Supplemental Table S1. Sequencing statistics for small RNAs: reads**

**Supplemental Table S2. Sequencing statistics for small RNAs: species**

**Supplemental Table S3. Normalized small RNA abundance**

**Supplemental Table S4. Sequences of RNA oligonucleotides**

## Supplemental Figure Legends

**Figure S1** Purified Dicer-2 produces shorter RNA products from pre-miRNA than does purified Dicer-1. 5' monophosphorylated pre-miRNAs (100 nM) were incubated with Dicer-1 or Dicer-2 (10 nM) for 2 h. Products were resolved by electrophoresis and detected by Northern hybridization. Sequences of DNA probes: *let-7*, 5'-TGA GGT AGT AGG TTG TAT AGT-3'; *let-7\**, 5'-AGA AAG CTA GCA CAT TGT ATA-3'; miR-8, 5'-GAC ATC TTT ACC TGA CAG TAT-3'; miR-8\*, 5'-CTA ATG CTG CCC GGT AAG ATG-3'; miR-79\*, 5'-ATG CTT TGG TAA TCT AGC TTT-3'; miR-79\*, 5'-ATA CAG CTA AAG CGC CAA AGC-3'.

**Figure S2** Inorganic phosphate inhibits binding to Dicer-2 of pre-miRNA and short dsRNA, but not long dsRNA. The figure provides representative gel images for the quantitative data in Figure 3. For Dicer-1, <sup>32</sup>P-radiolabeled pre-*let-7* (30 pM) was incubated with Dicer with or without 25 mM phosphate for 20 min at 4°C, then irradiated with 254 nm light to cross link bound substrate to enzyme. For Dicer-2, <sup>32</sup>P-radiolabeled RNA (30 pM) containing 5-iodouridine as the penultimate nucleotide was incubated with Dicer with or without 25 mM phosphate for 20 min at 4°C, then irradiated with 302 nm light. Samples were resolved by SDS-PAGE.

**Figure S3** Dicer-2 requires a 5' monophosphate to efficiently cleave pre-miRNA. pre-miR-307a (100 nM) bearing a 5' monophosphate or hydroxyl group were incubated with Dicer-2 (8 nM) with (red) or without (black) 25 mM inorganic phosphate. The substrate and product were detected by Northern hybridization using the DNA probe, 5'-TCGCTCACTCAAGGAGGTTG-3'. Data are mean ± SD for three independent trials.

**Figure S4** Dicer-2 requires a 5' monophosphorylated, two-nucleotide 3' overhanging end and is inhibited by inorganic phosphate for processing of short, but not long dsRNA. Dicer-2 (8 nM) was incubated with 5' <sup>32</sup>P-radiolabeled 30, 38, 52, or 73 bp long dsRNA (100 nM) bearing a 5' monophosphate or hydroxyl group and a blunt or two-nucleotide, 3' overhanging end with or without 1 mM ATP in the presence (red) or absence (black) of 25 mM inorganic phosphate. Data are mean ± SD for three independent trials.

**Figure S5** Inorganic phosphate increased  $K_M$  and decreased  $k_{cat}$  of Dicer-2 for pre-*let-7* and 30 bp dsRNA, but not 104 bp dsRNA. Michaelis-Menten kinetics were used to analyze Dicer-2 processing with (red) or without (black) 25 mM inorganic phosphate for (A) 5' <sup>32</sup>P-radiolabeled pre-*let-7* (6 nM Dicer-2); (B) 5' <sup>32</sup>P-radiolabeled 30 bp dsRNA with a 5' monophosphorylated, two-nucleotide, 3' overhanging end (6 nM Dicer-2); and (C) uniformly <sup>32</sup>P-radiolabeled 104 bp dsRNA with a 5' monophosphorylated, two-nucleotide, 3' overhanging end (1 nM Dicer-2). Reaction time courses for each substrate concentration are at right. Data are mean ± SD for three independent trials.
