# Supplementary material
Source: PubMed Central journal article supplement (PMC3989643)

pre-*let-7*

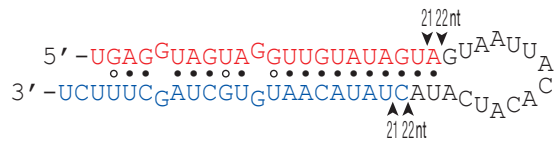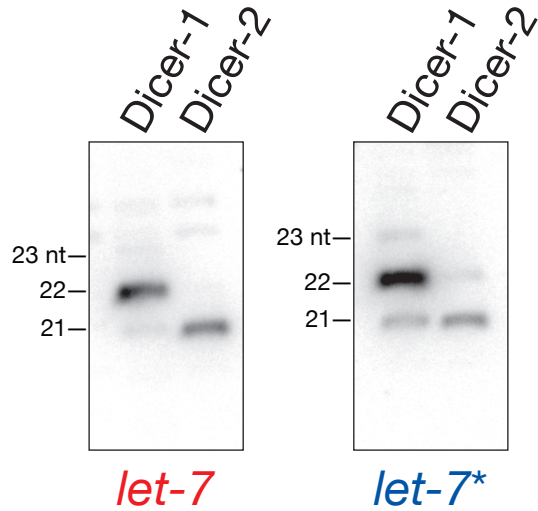

pre-miR-8

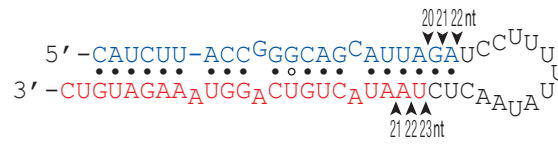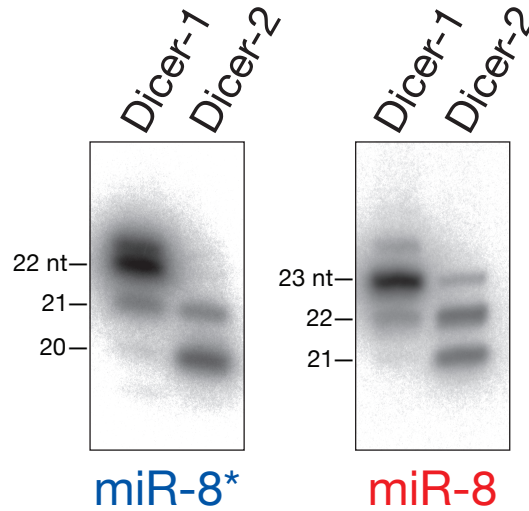

pre-miR-79

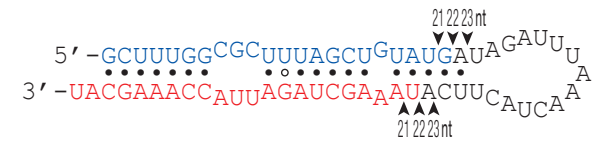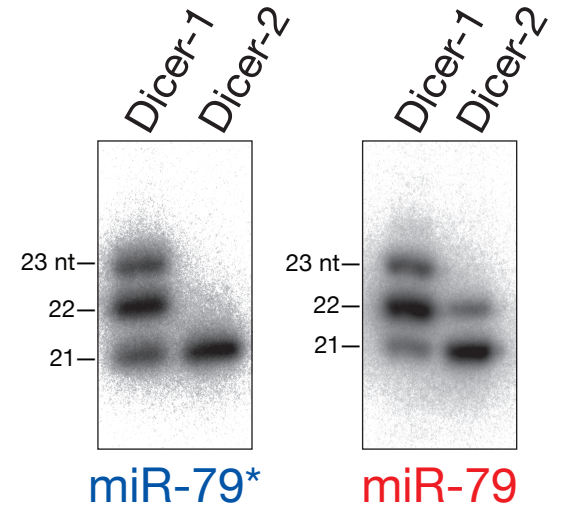

Supplement: embj0033-0371-sd1.pdf [file embj0033-0371-sd1.pdf]

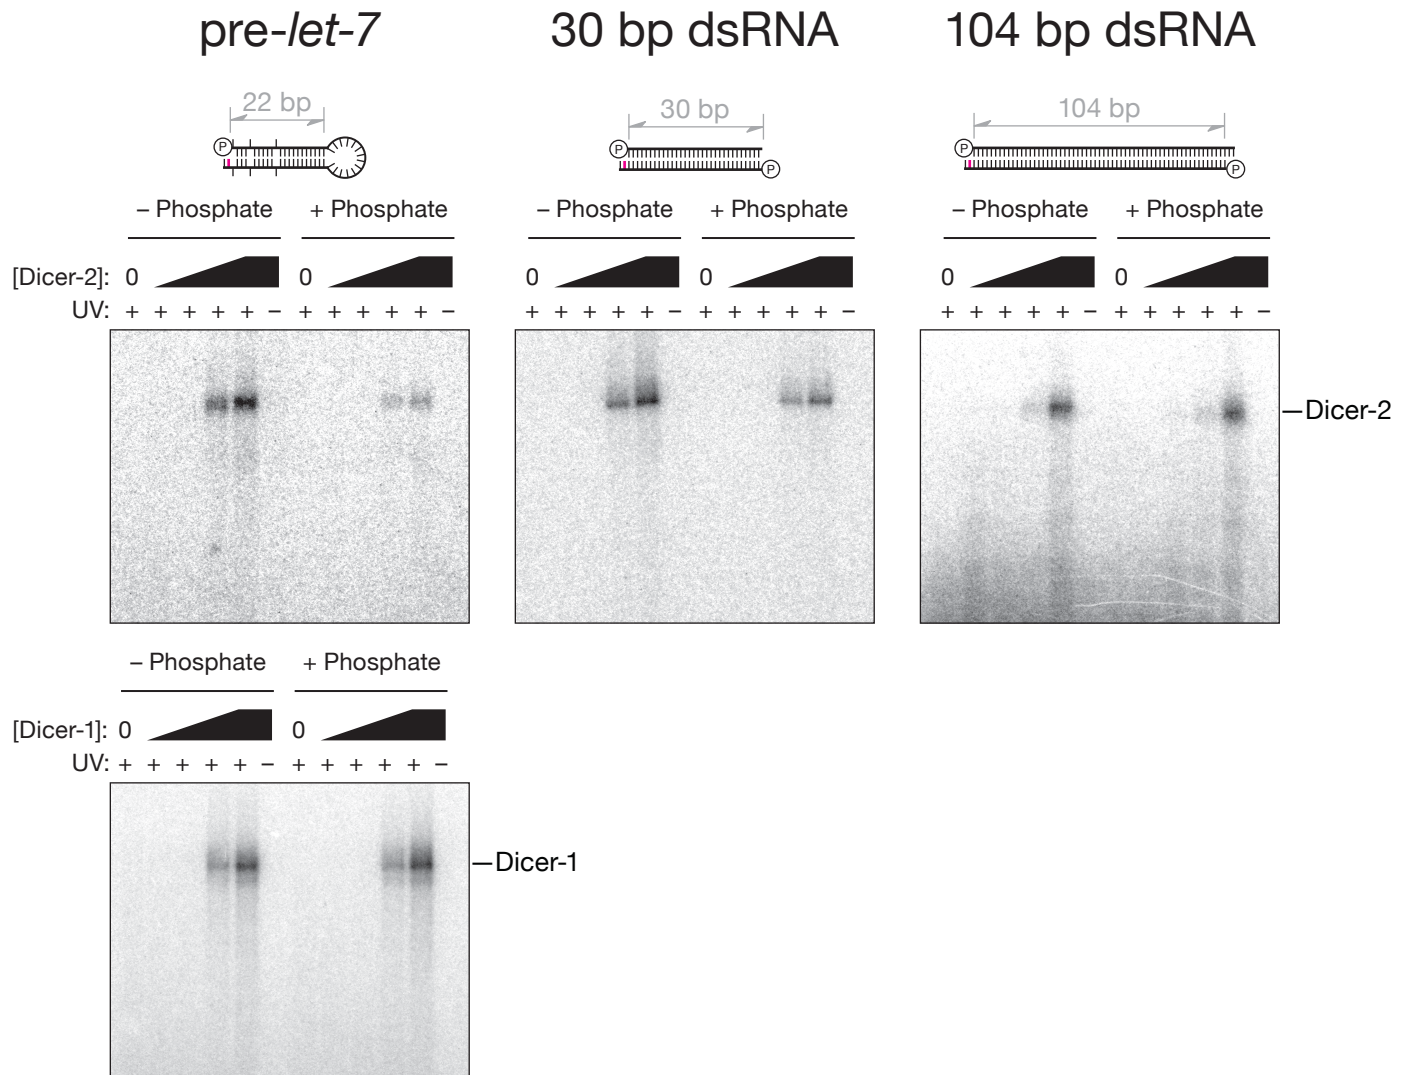

Supplement: embj0033-0371-sd2.pdf [file embj0033-0371-sd2.pdf]

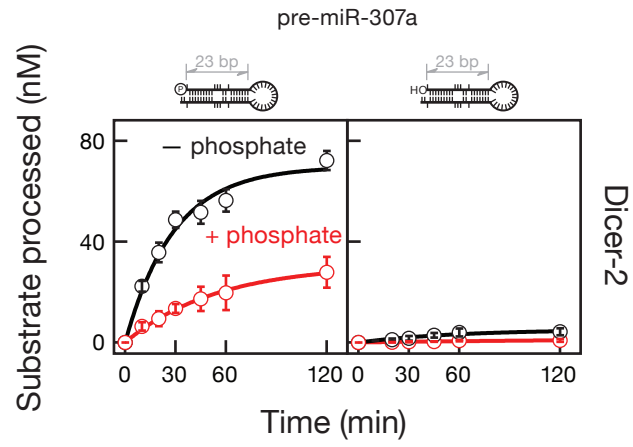

Supplement: embj0033-0371-sd3.pdf [file embj0033-0371-sd3.pdf]

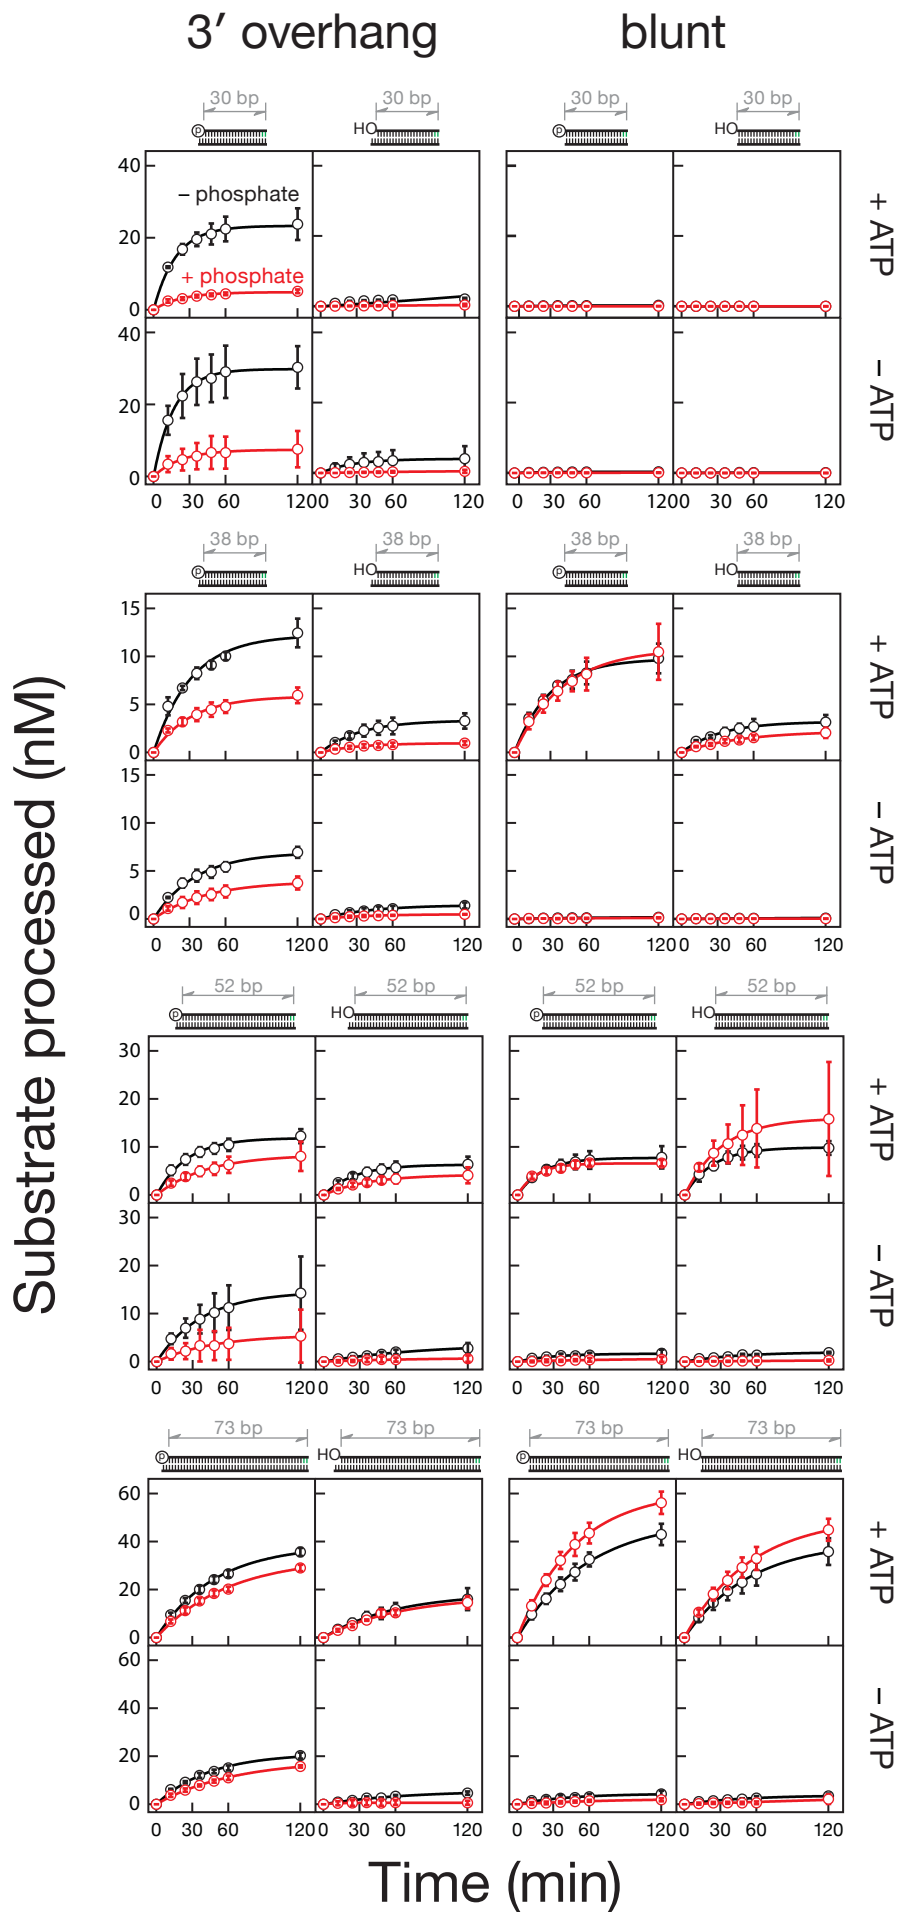

Supplement: embj0033-0371-sd4.pdf [file embj0033-0371-sd4.pdf]

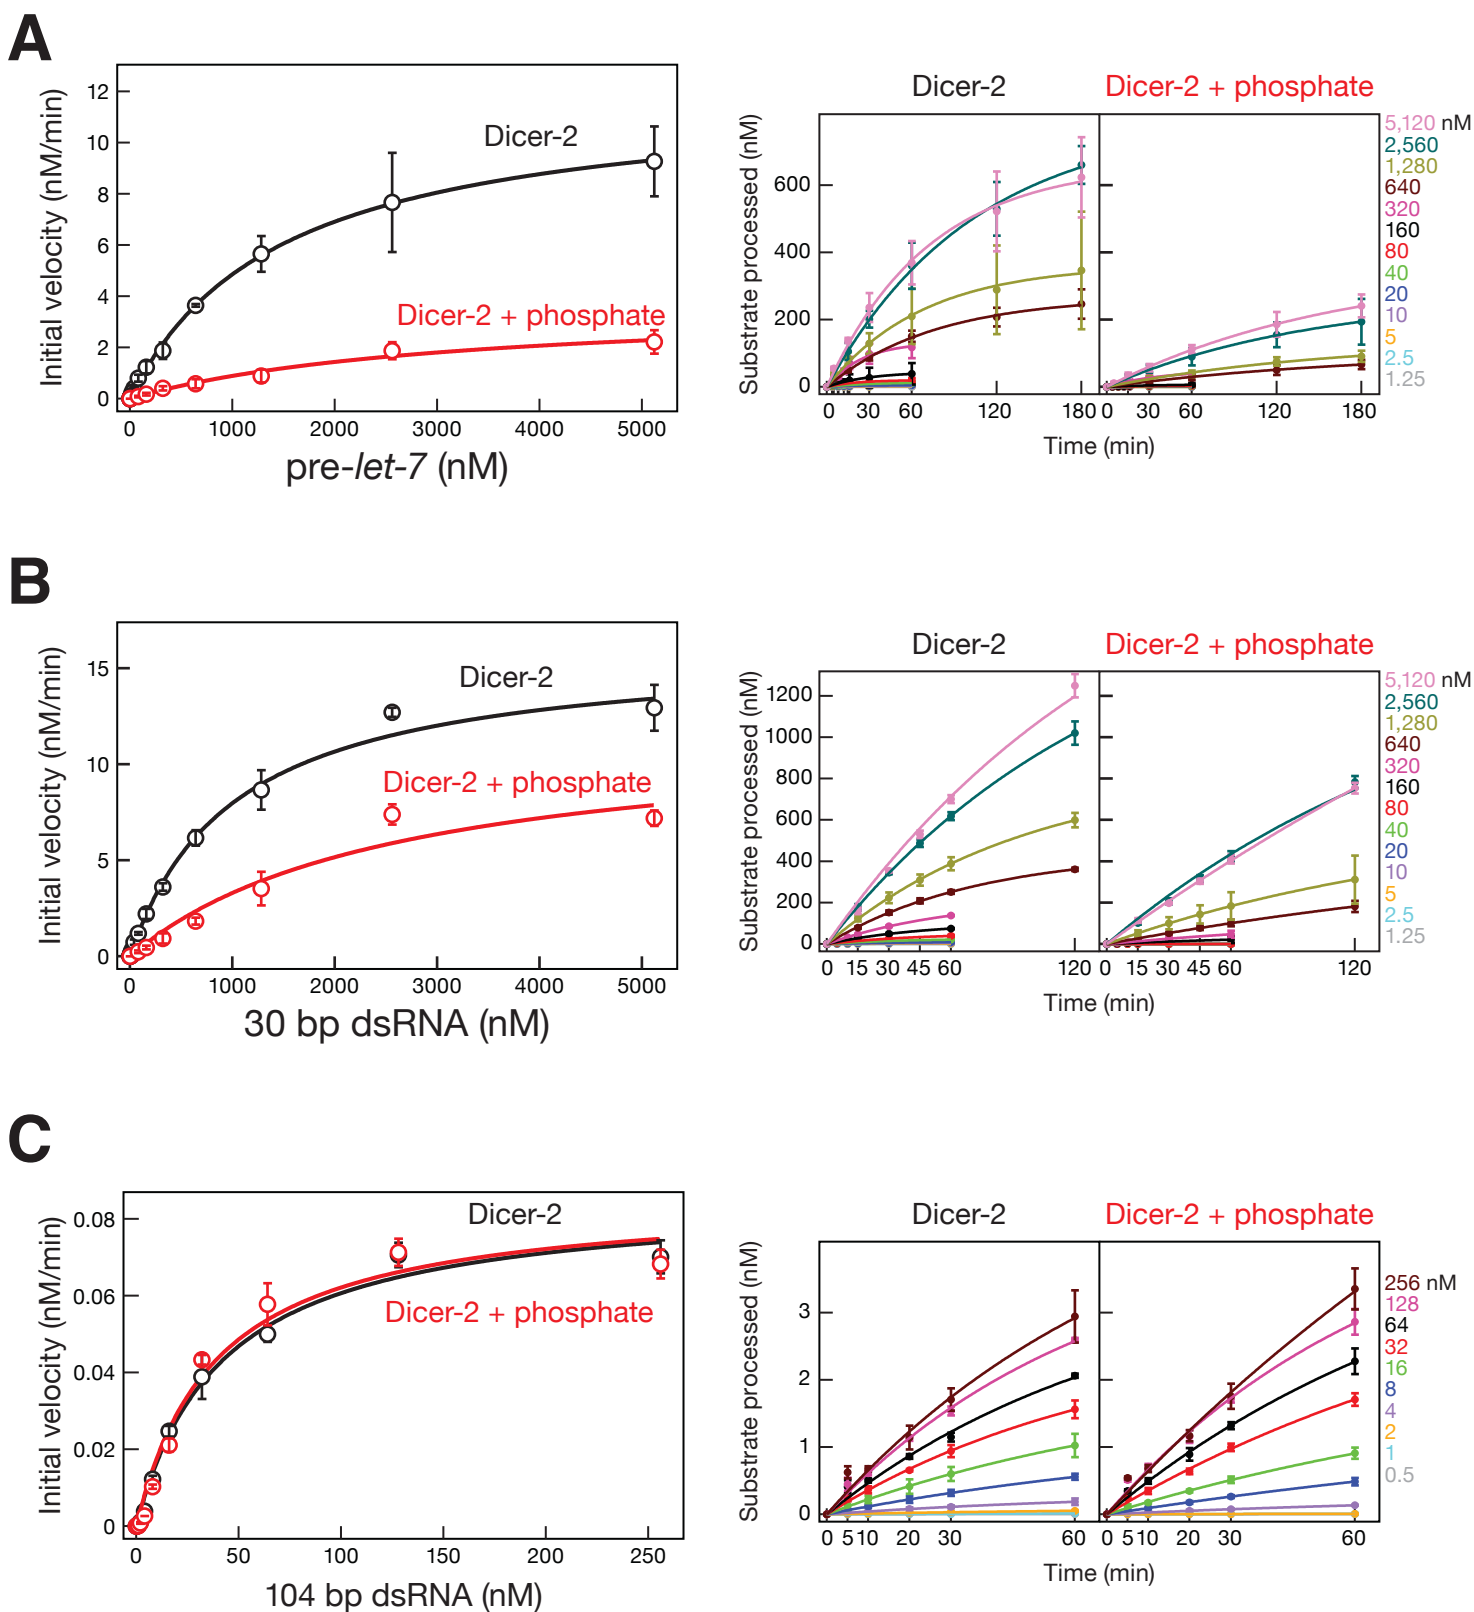

Supplement: embj0033-0371-sd5.pdf [file embj0033-0371-sd5.pdf]
